# Supplementary material for: Similarities and differences between IL11 and IL11RA1 knockout mice for lung fibro-inflammation, fertility and craniosynostosis
Source: PubMed Central journal article supplement (PMC8266813; doi:10.1038/s41598-021-93623-9), 2021-07-08

## Supplementary Figures:

Similarities and differences between IL11 and IL11RA1 knockout mice for lung fibro-inflammation, fertility and craniosynostosis

Benjamin Ng<sup>1,2†</sup>, Anissa A. Wijaja<sup>1†</sup>, Sivakumar Viswanathan<sup>1</sup>, Jinrui Dong<sup>1</sup>, Sonia P. Chothani<sup>1</sup>, Stella Lim<sup>1</sup>, Shamini G. Shekeran<sup>1</sup>, Jessie Tan<sup>1,2</sup>, Narelle E. McGregor<sup>3</sup>, Emma C. Walker<sup>3</sup>, Natalie A. Sims<sup>3,4</sup>, Sebastian Schafer<sup>1,2</sup>, Stuart A. Cook<sup>1,2,5,6\*</sup>

\*Corresponding author

Stuart A. Cook

Email: [stuart.cook@duke-nus.edu.sg](mailto:stuart.cook@duke-nus.edu.sg)

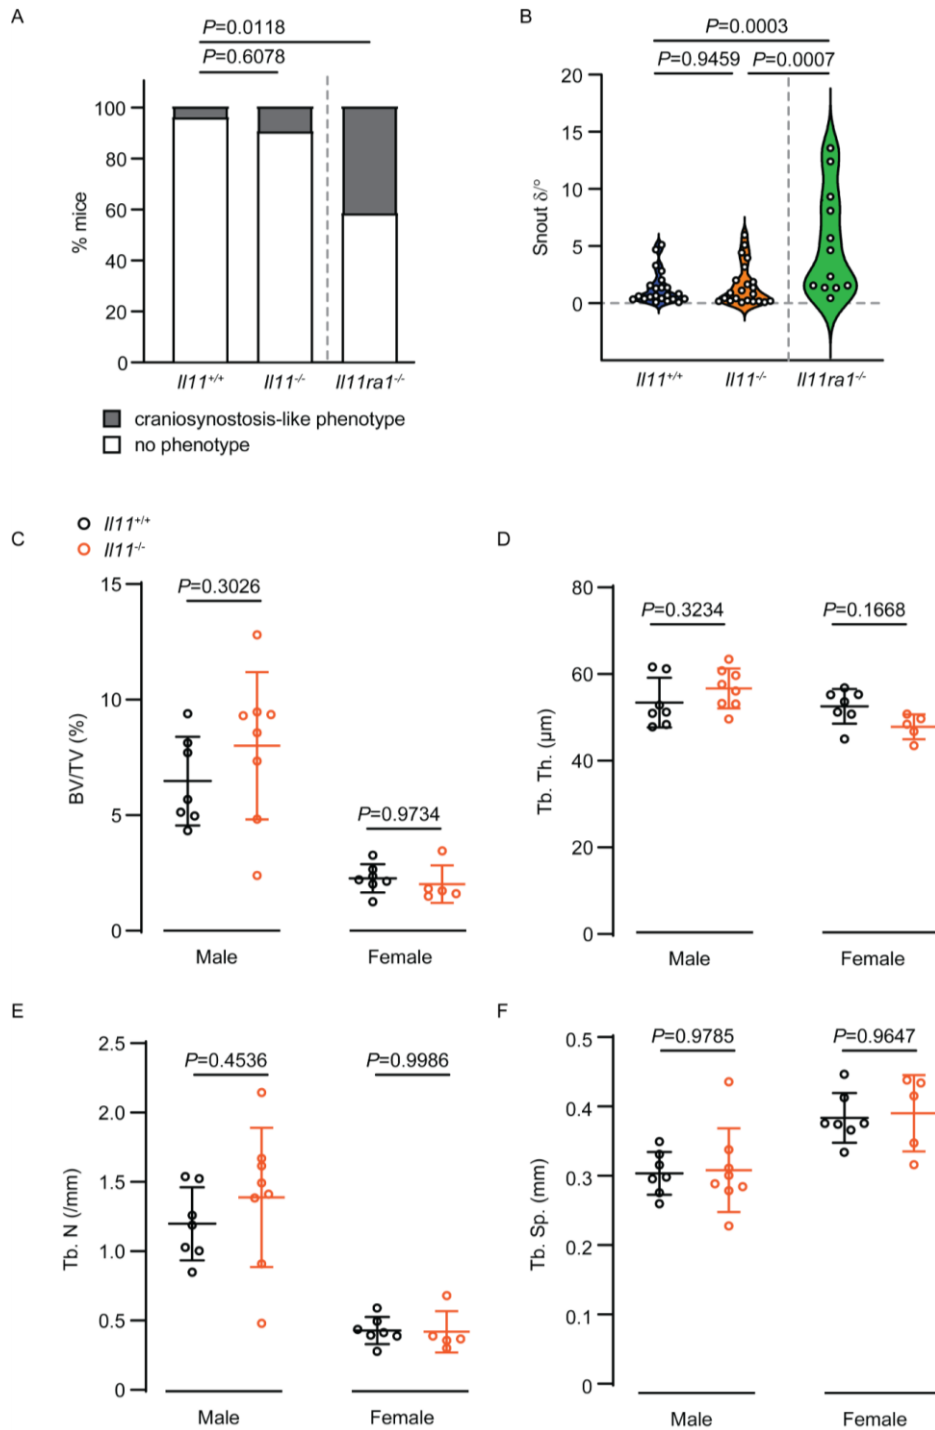

**Supplementary Figure S1. Skull and trabecular bone parameters of adult *Il11* knockout mice.**

(A) Proportion of mice with cranosynostosis-like phenotype and (B) the degree of deviation from linear snout growth ( $\delta^\circ$ ) was determined in *Il11*<sup>-/-</sup> and *Il11ra1*<sup>-/-</sup> as compared to *Il11*<sup>+/+</sup> mice (*Il11*<sup>+/+</sup> *n*=23, *Il11*<sup>-/-</sup> *n*=22, *Il11ra1*<sup>-/-</sup> *n*=12), all on a C57BL/6J background. Data points in panel B for *Il11*<sup>+/+</sup> and *Il11*<sup>-/-</sup> mice are presented in main Fig. 1F and replotted here as a reference. (C-F) The  $\mu$ CT analysis of the distal femora of male and female *Il11*<sup>-/-</sup> and *Il11*<sup>+/+</sup> mice (12 weeks of age); *n*=5-7 mice per genotype per gender. (A) Trabecular bone volume per total volume (BV/TV; %), (B) trabecular thickness (Tb.Th.), (C) trabecular number (Tb. N) and (D) trabecular separation (Tb. Sp.). Data in A are shown as stacked bar graphs; B shown as violin plot; C-F are shown as mean  $\pm$  SD; *P* values were determined by Fisher's exact test in panel A, ANOVA (Tukey's test) in panel B and by Student's *t*-test in panels C-F.

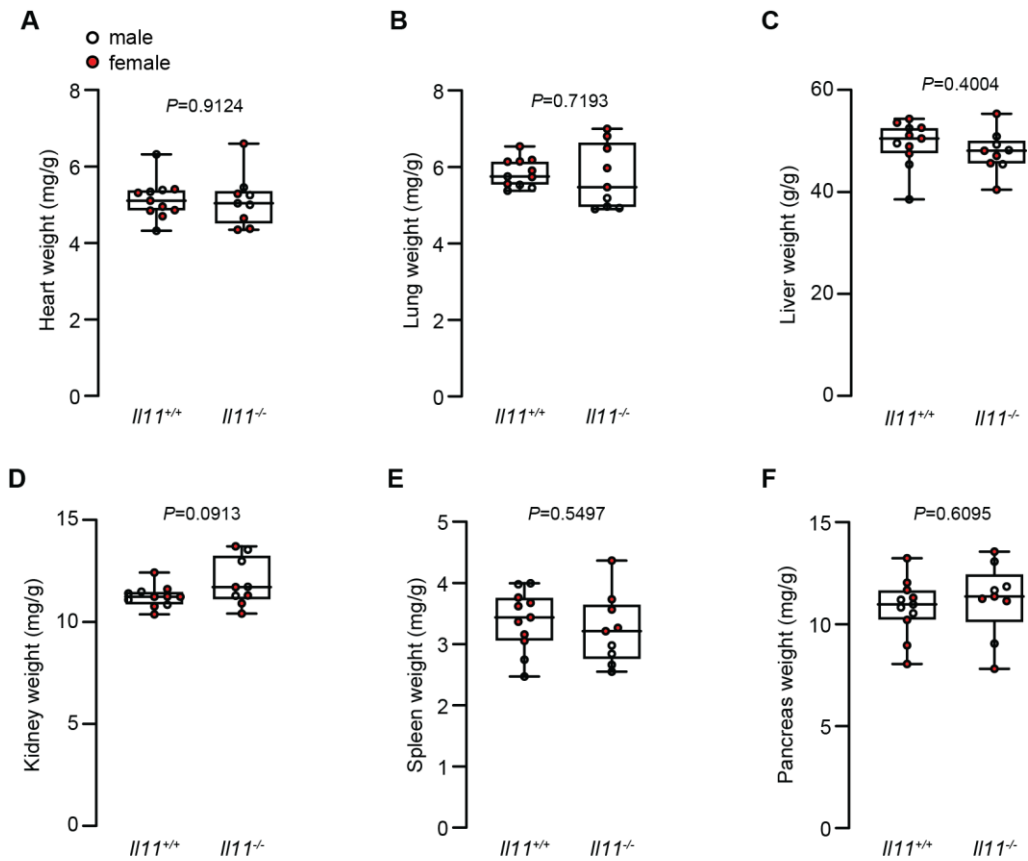

**Supplementary Figure S2. Anatomical characterization of adult *II11* knockout mice.** (A) Heart weight-, (B) lung weight-, (C) liver weight-, (D) kidney weight-, (E) spleen weight- and (F) pancreas weight-to-body weight indices of male and female *II11*<sup>-/-</sup> and wild-type mice (10-14 weeks of age) (n=9-10 per genotype). Data shown as: centre line, median value; box edges, 25th and 75th percentiles; whiskers, minimum and maximum values; *P* values were determined by Student's *t*-test

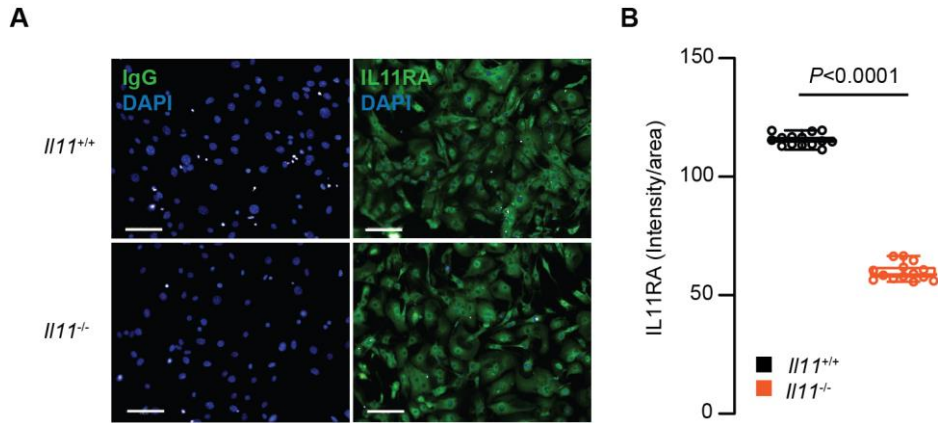

**Supplementary Figure S3. Fibroblasts from *Il11* knockout mice have reduced IL11RA expression.** (A) Representative images and (B) quantification of IL11RA immunostaining in *Il11*<sup>-/-</sup> and wild type fibroblasts. Scale bars: 200  $\mu$ m. Data shown as mean  $\pm$  SD; *P* value was determined by Student's *t*-test.

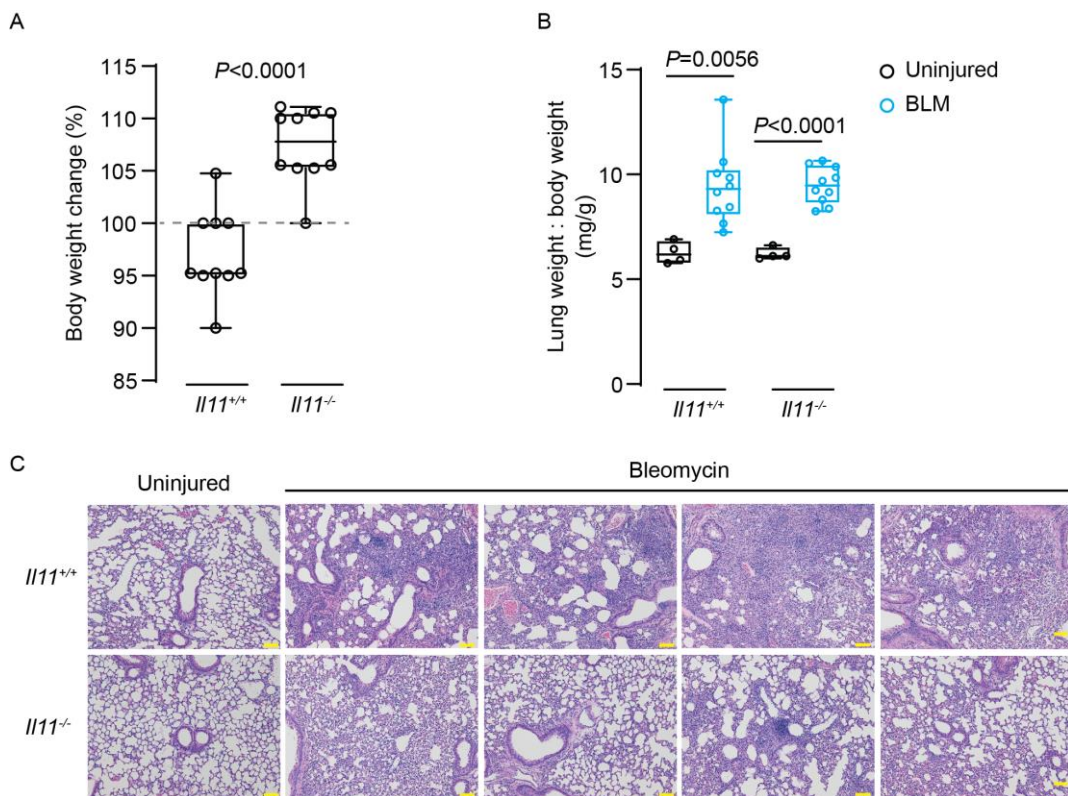

**Supplementary Figure S4. Body and lung weights of *Il11* knockout and wild-type mice post-bleomycin injury.** (A) Percentage body weight change post-BLM challenge (day 14 versus day 0), (B) lung weight to body weight index and (C) hematoxylin and eosin staining of lung sections from *Il11*<sup>-/-</sup> and wild-type mice 14 days post-BLM. Scale bars: 100  $\mu$ m. Data shown as: centre line, median value; box edges, 25th and 75th percentiles; whiskers, minimum and maximum values; *P* values were determined by Student's *t*-test.

Uncropped blots for Fig 5A

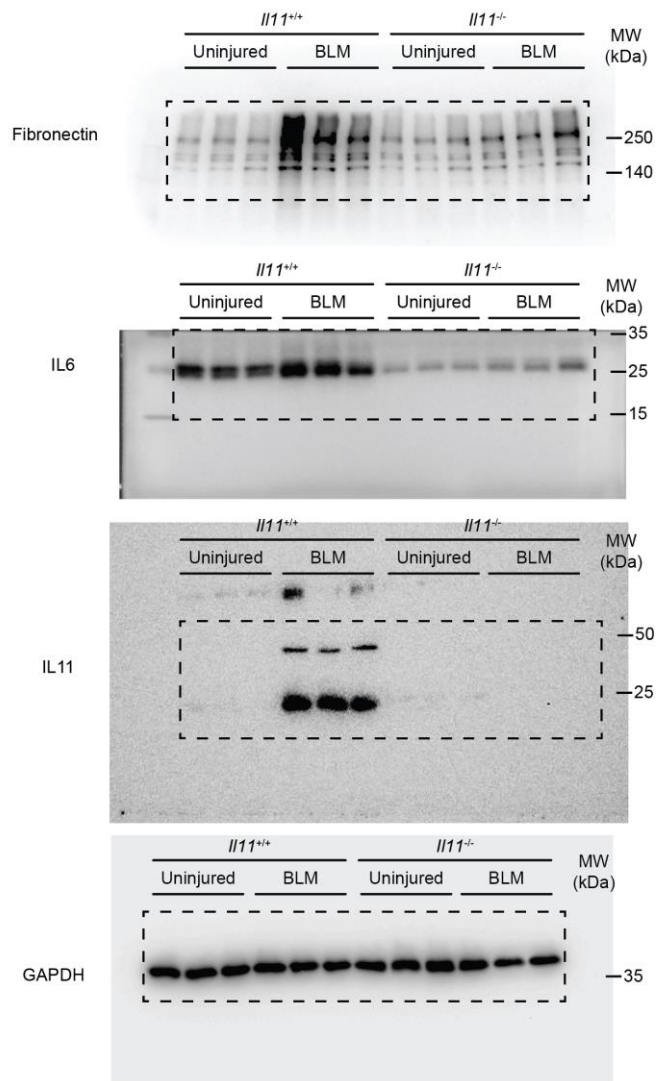

Uncropped blots for Fig 5B

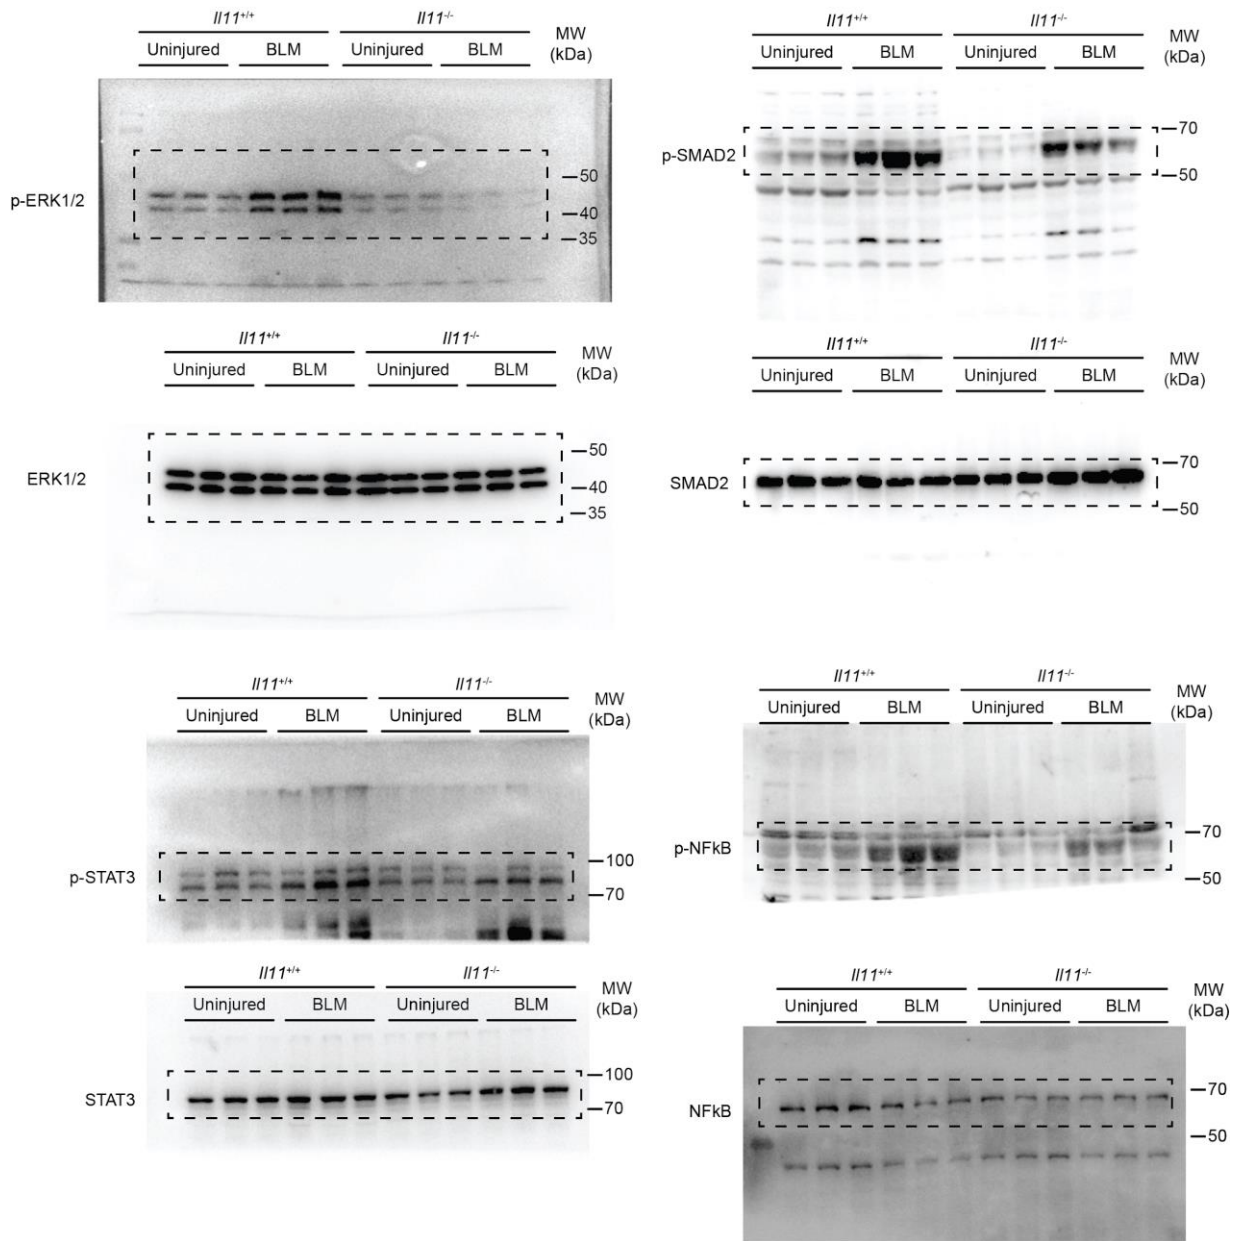

Supplement: 41598_2021_93623_MOESM1_ESM.pdf [file 41598_2021_93623_MOESM1_ESM.pdf]
